# Supplementary material for: Increased Cardiometabolic Risk Factors and Inflammation in Adipose Tissue in Obese Subjects Classified as Metabolically Healthy
Source: Oxford University Press journal article supplement (doi:10.2337/dc14-0937), 2014-07-11

# SUPPLEMENTARY DATA

**Supplementary Table 1.** Sequences of the primers and TaqMan® probes

| Gene (GenBank accession) | Oligonucleotide sequence (5'-3')        |
|--------------------------|-----------------------------------------|
| <i>SPP1</i> (NM_000582)  |                                         |
| Forward                  | CATCCAGTACCCTGATGCTACAGA                |
| Reverse                  | GGCCTTGTATGCACCATTCAA                   |
| TaqMan Probe             | FAM-ACATCACCTCACACATGGAAAGCGAGGA-TAMRA  |
| <i>TNF</i> (NM_00594)    |                                         |
| Forward                  | CCCCAGGGACCTCTCTCTAATC                  |
| Reverse                  | ACATGGGCTACAGGCTTGTCA                   |
| TaqMan Probe             | FAM-CCTCTGGCCCAGGCAGTCAGATCAT-TAMRA     |
| <i>TLR4</i> (NM_138554)  |                                         |
| Forward                  | CTGCGTGGAGGTGGTTCCTA                    |
| Reverse                  | CAGGTCCAGGTTCTTGGTTGAG                  |
| TaqMan Probe             | FAM-TTTCTACAAAATCCCCGACAACCTCCCCT-TAMRA |
| <i>SFRP5</i> (NM_003015) |                                         |
| Forward                  | TGCATCGCCGTGCAGTT                       |
| Reverse                  | TGCGCATTTTGACCACAAAG                    |
| TaqMan Probe             | FAM-CCAGTGACCAAGATCTGCGCCCA-TAMRA       |
| <i>TNC</i> (NM_002160)   |                                         |
| Forward                  | AGGCGATCCCAGACAGTCAGT                   |
| Reverse                  | TCCAGCTGACAGTAGCCGAATT                  |
| TaqMan Probe             | FAM-AACAACAGCCATGGGCTCCCCAAA-TAMRA      |
| <i>MMP9</i> (NM_004994)  |                                         |
| Forward                  | GCCCGGACCAAGGATACAGT                    |
| Reverse                  | CCCCTCAGTGAAGCGGTACA                    |
| TaqMan Probe             | FAM-ACGCGCTGGGCTTAGATCATTCCTCA-TAMRA    |

*SPP1*, secreted phosphoprotein 1 (osteopontin); *TNF*, tumour necrosis factor, *TLR4*, toll-like receptor 4; *SFRP5*, secreted frizzled-related protein 5; *TNC*, tenascin C; *MMP9*, matrix metalloproteinase 9.

## SUPPLEMENTARY DATA

**Supplementary Figure 1.** Cardiometabolic risk factors are similarly increased in metabolically healthy obese (MHO) and metabolically abnormal obese (MAO) patients from cohort 1. CRP, C-reactive protein; ALT, alanine aminotransferase;  $\gamma$ -GT,  $\gamma$ -glutamyltransferase. Box represents interquartile range and median inside, with whiskers showing 10/90 percentiles. Differences between groups were analyzed by one-way ANOVA followed by Tukey's *post hoc* tests or Kruskal-Wallis followed by Mann-Whitney's U as appropriate. \* $P < 0.05$ , \*\* $P < 0.01$  and \*\*\* $P < 0.001$ .

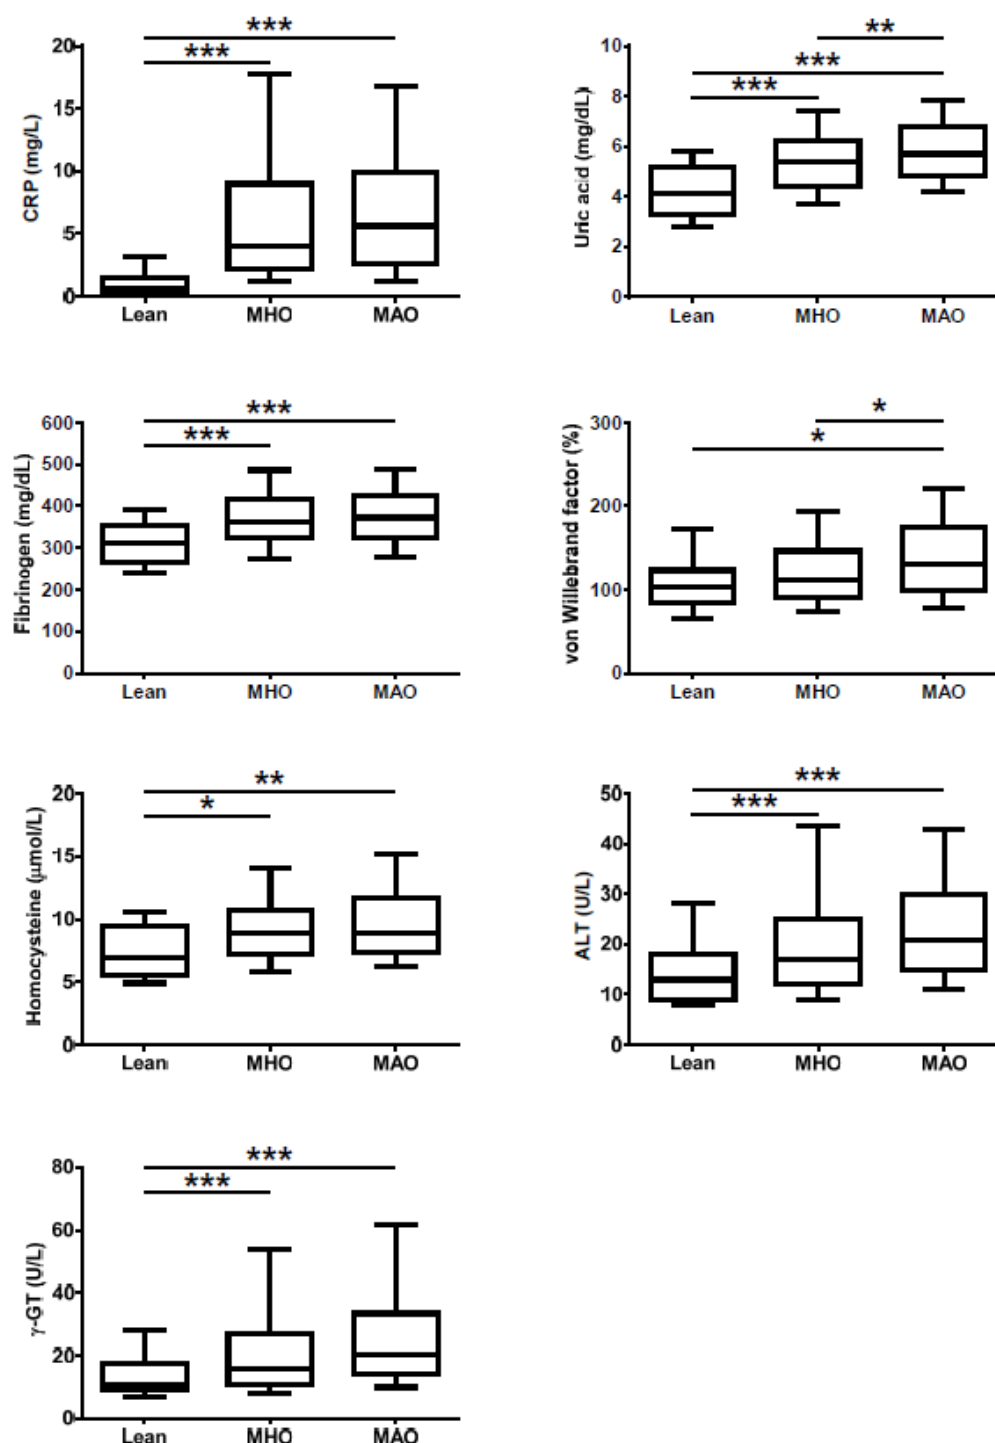

SUPPLEMENTARY DATA

**Supplementary Figure 2.** Cardiometabolic risk factors are similarly increased in metabolically healthy obese (MHO) and metabolically abnormal obese (MAO) patients from cohort 2. CRP, C-reactive protein; ALT, alanine aminotransferase;  $\gamma$ -GT,  $\gamma$ -glutamyltransferase. Box represents interquartile range and median inside, with whiskers showing from minimum to maximum. Differences between groups were analyzed by one-way ANOVA followed by Tukey's *post hoc* tests or Kruskal-Wallis followed by Mann-Whitney's U as appropriate. \* $P < 0.05$ , \*\* $P < 0.01$  and \*\*\* $P < 0.001$ .

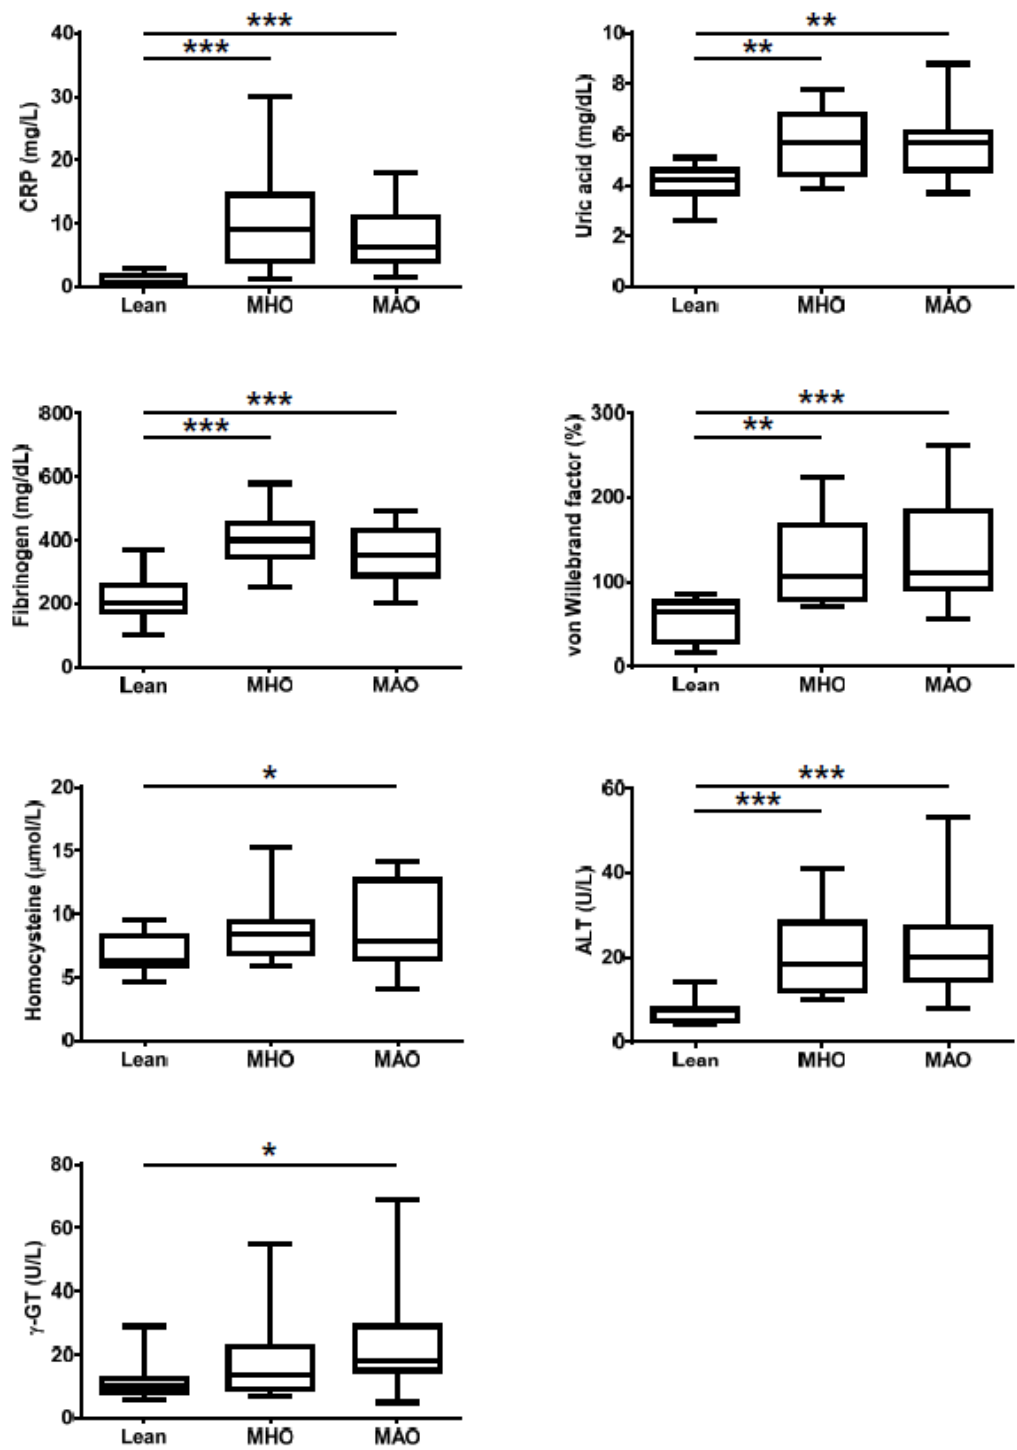

Supplement: dc140937supplementarydata.pdf [file dc140937supplementarydata.pdf]
